# Supplementary material
Source: publisher figshare collection journal article supplement (https://diabetesjournals.figshare.com/ndownloader/files/24021332)
Supplement: Supplementary file 1 [file 24021332]

## Online-Only Supplementary Material

(Diabetes Care 2020 | <https://doi.org/10.2337/dc19-2316>)

# Impact of a Weekly Glucagon-Like Peptide 1 Receptor Agonist, Albiglutide, on Glycemic Control and on Reducing Prandial Insulin Use in Type 2 Diabetes Inadequately Controlled on Multiple Insulin Therapy: A Randomized Trial

Julio Rosenstock, MD; Antonio Nino, MD; Joseph Soffer, MD; Lois Erskine, PhD; Andre Acosta, PhD; Jo Dole, PhD; Molly C. Carr, MD; Jason Mallory, PhD; Philip Home, DM

## Table of Contents

|                                                                                                               |           |
|---------------------------------------------------------------------------------------------------------------|-----------|
| <b>List of Principal Investigators .....</b>                                                                  | <b>2</b>  |
| <b>Supplementary Fig 1. Study Design.....</b>                                                                 | <b>4</b>  |
| <b>Supplemental Data: Inclusion and Exclusion Criteria.....</b>                                               | <b>5</b>  |
| Inclusion criteria .....                                                                                      | 5         |
| Exclusion criteria.....                                                                                       | 6         |
| <b>Supplementary Fig 2. Reintroducing Insulin Lispro for Albiglutide-<br/>    Treated Participants.....</b>   | <b>8</b>  |
| <b>Supplementary Table 1. Titration Algorithm for Recommended Lispro<br/>    Dose Adjustment. ....</b>        | <b>9</b>  |
| <b>Supplementary Table 2. Titration Algorithm for Recommended Glargine<br/>    Dose Adjustment. ....</b>      | <b>10</b> |
| <b>Supplemental Data: Prespecified Hierarchical Testing .....</b>                                             | <b>11</b> |
| <b>Supplementary Table 3. Analysis Methods for Secondary End Points. ....</b>                                 | <b>11</b> |
| <b>Supplementary Fig 3. CONSORT Diagram. ....</b>                                                             | <b>12</b> |
| <b>Supplementary Table 4. TRIM-Diabetes Questionnaire Individual Domain Scores.....</b>                       | <b>13</b> |
| <b>Supplementary Table 5. Overview of Adverse Events of Special Interest<br/>    (Safety Population).....</b> | <b>15</b> |
| <b>References .....</b>                                                                                       | <b>15</b> |

## List of Principal Investigators

**The authors thank the Principal Investigators on the study.**

**Below is the list of those who agreed to be acknowledged.**

**Brazil:** *Luis Henrique Canani* of CPD Centro de Pesquisas Em Diabetes; *Fabio dos Santos* of Loema Instituto de Pesquisa Clínica; *João Felício* of Hospital Universitário João de Barros Barreto; *Guilherme Rollin* of Associação Hospitalar Moinhos de Vento; *João Eduardo Salles* of IPEC - Instituto de Pesquisa Clínica; *Wladimir Saporito* of Instituto de Moléstias Cardiovasculares Tatuí; **Canada:** *Harpreet Bajaj* of LMC Diabetes and Endocrinology; *Ronald Goldenberg* of LMC Diabetes and Endocrinology; *Lawrence Leiter* of St Michael's Hospital; *Azhar Toma* of Manna Research Inc.; *David Twum-Barima* of Lifestyle Metabolism Center; **France:** *Bertrand Cariou* of L'institut du thorax, CHU NANTES; *Bruno Guerci* of CHRU Nancy; *Catherine Petit* of Centre Hospitalier Sud Francilien; *Pierre Sérusclat* of Groupe Hospitalier Les Portes du Sud; *Bruno Vergès* of CHRU Dijon Complexe Du Bocage; *Odile Verier-Mine* of Hopital de Valenciennes; **Germany:** *Ulrich Aigner* of Versdias GmbH; *Hasan Alawi* of Diabetes Centrum Saarlouis; *Andreas Birkenfeld* of University Hospital Dresden, TU Dresden; *Karl Derwahl* of Institut für Klinische Forschung Und Entwicklung Berlin GmbH; *Eva Haak* of Diabetespraxis Mergentheim; *Christoph Hasslacher* of Diabetesinstitut Heidelberg; *Susanne Hölitz-Röhrig* of Gemeinschaftspraxis für Innere und Allgemeinmedizin, Diabetologie und Notfallmedizin; *Hans-Peter Kempe* of Die Praxis am Ludwigsplatz – Ludwigshafen; *Gerhard Klausmann* of Studienzentrum Aschaffenburg; *Christine Kosch* of Office of Christine Kosch, Dipl.-Med; *Stephan Maxeiner* of Schwerpunktpraxis Diabetologie; *Joachim Sauter* of Praxis Dr. Sauter; *Axel Schaefer* of Medizentrum Essen Borbeck; *Alexander Segner* of Praxis Dr. med. Alexander Segner; *Jochen Seufert* of Universitätsklinikum Freiburg; *Charlotte von Engelhardt* of Klinische Forschung, Schwerin GmbH (KFGN); **Hungary:** *Péter Faludi* of XV. kerületi Önkormányzat Egészségügyi Intézménye; *László Könyves* of Lausmed Kft.; *Botond Literati-Nagy* of DRC Gyógyszervizsgáló Központ Kft.; *Károly Nagy* of Synexus (DRS) - Synexus Magyarország Kft. Budapest; *Tamás Oroszlán* of Zala Megyei Szent Rafael Korház; *Istvan Wittmann* of Pécsi Tudományegyetem; **Italy:** *Paolo Calabrò* of Azienda Ospedaliera Monaldi; Division of Cardiology University of Campania "Luigi Vanvitelli"; *Giulio Marchesini* of Azienda Ospedaliera Universitaria Di Bologna - Policlinico S Orsola Malpighi; *Piermarco Piatti* of Ospedale San Raffaele S.r.l. – PPDS; *Paolo Pozzilli* of Università Campus Bio Medico Di Roma; **Korea:** *Moon-Kyu Lee* of Samsung Medical Center, Sungkyunkwan University School of Medicine; *Jeong-Hyun Park* of Inje University Busan Paik Hospital; *Kee-Ho Song* of Konkuk University Medical Center; *Kun-Ho Yoon* of The Catholic University of Korea, Seoul St. Mary's Hospital; **Mexico:** *Carlos Aguilar-Salinas* of Instituto Nacional de Ciencias Medicas y Nutricion Salvador Zubiran; *Nacu Caracas* of Endocrinologia y Nutriologia; *Ricardo Choza Romero* of Servicio de Asistencia Tecnica Medica; *José Garza Ruiz* of IMED Internal Medicine Clin Trials; *Guillermo Gonzalez-Galvez* of Instituto Jalisciense de Investigación En Diabetes Y Obesidad; *Jose Gonzalez-Gonzalez* of Hospital Universitario Dr. Jose Eleuterio González; *Marisol Herrera* of Unidad de investigación Clínica y atención Medica HEPA S. C.; *David Lopez Villezca* of Unidad de Investigación Clínica En Medicina SC; *Norma Martinez Trejo* of Clinicos Asociados BOCM SC; *Carlos Eduardo Medina-Pech* of Medical Care and Research S.A. de C.V.; *Guadalupe Morales Franco* of Centro de Diabetes Durango; *Luis Nevarez Ruiz* of Investigacion en Salud y Metabolismo S.C.; *Gabriel Ramos Lopez* of Consultorio Privado del Dr Gabriel Arturo Ramos Lopez; *Roxana Reyes Sanchez* of CardioPrevent; *Joel Rodriguez-Saldaña* of Resultados Medicos Desarrollo E Investigacion SC – REMEDI; *Lucas Solis Morales* of Centro de Alta Especialidad Dr. Rafael Lucio; **Philippines:**

Grace Aquitania of Davao Doctors Hospital; Clodoaldo Caringal of Philippine Heart Center; Elizabeth Ann Catindig of Institute for Studies of Diabetes Foundation; Myla Custodio of Far Eastern University Hospital Nicanor Reyes Medical Foundation; MaryAnne Lim-Abraham of Philippine General Hospital; **Poland:** Malgorzata Arciszewska of NZOZ Specjalistyczny Ośrodek Internistyczno-Diabetologiczny; Katarzyna Cypryk of Gabinet Lekarski Malgorzata Saryusz-Wolska; Iwona Kobielska-Gembala of Medicome Sp. z o.o.; Marek Konieczny of KO-MED Centra Kliniczne Sp. z o.o.; Elżbieta Kramarczuk of Ko-Med Centra Kliniczne Sp. z o.o.; Piotr Mader of NZOZ Praktyka Dentystyczna - Internistyczna w Kamiencu Zabkowickim; Dorota Młodawska-Choluj of Niepubliczny Zakład Opieki Zdrowotnej Centrum Medyczne AESKULAP; Agnieszka Strzelecka-Sosik of KO-MED Centra Kliniczne Sp. z o.o.; Andrzej Wittek of Specjalistyczna Praktyka Lekarska; Iwona Wozniak of KO-MED Centra Kliniczne Sp. z o.o.; **South Africa:** Aysha Badat of Wits Chris Hani Baragwanath Clinical Trial Site; Andrew Jacovides of Midrand Medical Center; Jaco Jurgens of Office of Dr Jaco Cornelius Juhl Jurgens; Johan Lombaard of Joshua Research; Mohamed Omar of Centre for Diabetes and Endocrinology; Louis van Zyl of Clinical Projects Research SA pty Ltd; Jeffrey Wing of Charlotte Maxeke Johannesburg Academic Hospital; **Spain:** Diego Bellido of CHUF – H.U. Arquitecto Marcide; Marta Botella of Hospital Universitario Principe de Asturias; Miguel Angel Brito Sanfiel of Hospital Universitario Puerta de Hierro – Majadahonda; Carmen Fajardo-Montañana of Hospital Universitario de La Ribera, Alzira; Pablo Fernández-Catalina of Hospital de Montecelo; Juan Carlos Ferrer-Garcia of Hospital General Universitario de Valencia; Sara García Arias of Complejo Asistencial Universitario de León; Sonia Gaztambide of Hospital Universitario Cruces; Ricardo Gómez-Huelgas of Hospital Regional Universitario de Málaga – Hospital General; Natalia Hillman Gadea of Hospital Universitario La Paz; Esteban Jodar of Hospital Universitario Quironsalud Madrid; Mónica Marazuela of Hospital Universitario de La Princesa; Luis Masmiquel Comas of Hospital Son Llatzer; Juan Francisco Merino-Torres of Hospital Universitari i Politècnic La Fe de Valencia; Teresa Muros de Fuentes of Hospital Universitario Virgen de Las Nieves; Juan Parra Barona of Hospital de Mérida; Antonio Pérez of Hospital de La Santa Creu i Sant Pau; María Dolores Santos Rey of Hospital Universitari Arnau de Vilanova; Berta Soldevila of Hospital Universitario Germans Trias i Pujol; Alfonso Soto Gonzalez of Hospital Universitario A Coruña; Francisco J Tinahones Madueno of Hospital Universitario Virgen de la Victoria; Josep Vidal Cortada of Hospital Clinic de Barcelona; **United Kingdom:** Stephen Bain of Singleton Hospital; Mimi Chen of Royal United Hospital; Ken Darzy of Queen Elizabeth II Hospital; T. Hugh Jones of Barnsley Hospital; Tejpal Purewal of Royal Liverpool University Hospital; Thozhukat Sathyapalan of Hull And East Yorkshire Hospitals NHS Trust **United States:** Samir Arora of Aventiv Research; Kenneth Blaze of South Broward Research; Gholamreza Bonabi of Diabetes Medical Center of California; Deanna Cheung of Long Beach Center For Clinical Research; Humberto Cruz of Florida Institute For Clinical Research LLC; Raymond de la Rosa of Four Rivers Clinical Research Incorporated; Ronald Graf of MultiCare Institute for Research and Innovation; Barry Horowitz of Metabolic Research Institute Inc; Cynthia Huffman of Meridien Research – Bradenton; Leslie Klaff of Rainier Clinical Research Center Inc; Gregory Ledger of Mercy Medical Research Institute; Kurt Lesh of Synexus - Clinical Research Advantage, Inc. - Colorado Springs Family Practice; David Liljenquist of Rocky Mountain Diabetes and Osteoporosis Center; Brian McCormick of Hampton Family Practice; Salil Nadkarni of Downtown LA Research Center Inc; Kerem Ozer of Texas Diabetes and Endocrinology PA; Daniel Pace of Searcy Medical Center; Joe Pouzar of Centex Studies Inc; Luis Quintero of International Research Associates LLC; Paul Rosenblit of Diabetes/Lipid Management and Research Center; Jeffrey Rothman of University Physicians Group; Jean-Louis Selam of Diabetes Research Center; Dan Streja of San Fernando Valley Health Institute; Francisco Velazquez of Pioneer Research Solutions; Dwayne Williams of Dr Dwayne Williams.

## Supplementary Fig 1. Study Design.

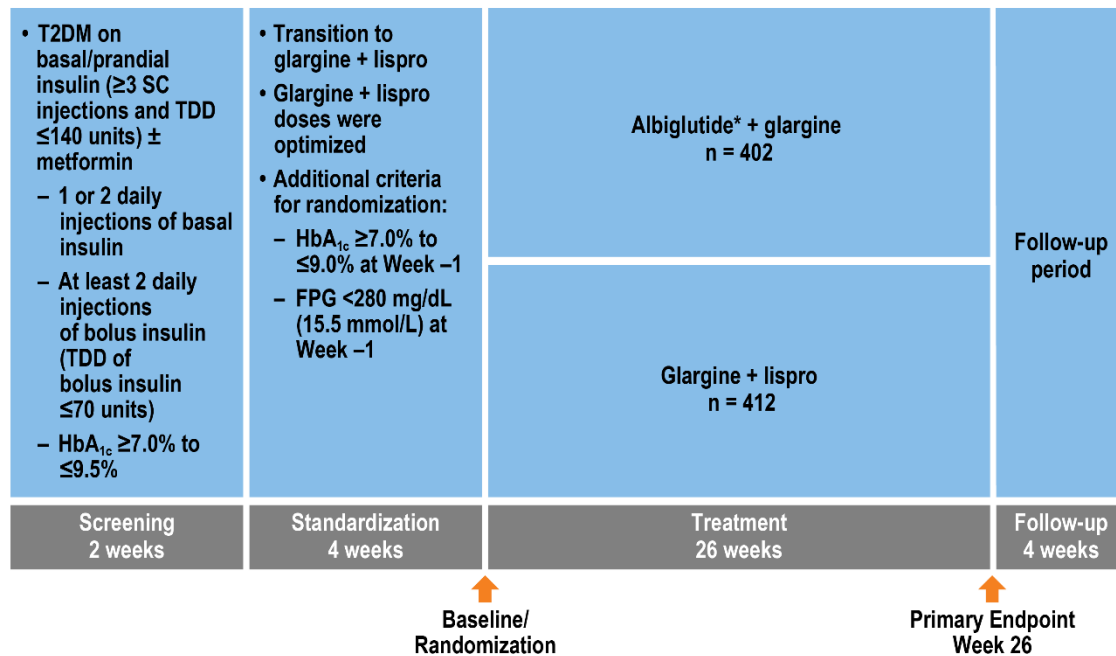

FPG denotes fasting plasma glucose,  $HbA_{1c}$  glycated hemoglobin, SC subcutaneous, TDD total daily dose, T2DM type 2 diabetes mellitus

\*At Baseline/Randomization, albiglutide was started at 30 mg once weekly with up-titration to albiglutide 50 mg once weekly at Week 4. Subjects randomly assigned to this treatment group were to reduce lispro by 50% at Baseline/Randomization, followed by complete (100%) discontinuation of lispro at Week 4

Randomized treatment assignment was done via the interactive voice response system, and randomization was implemented based on a sequestered fixed randomization schedule. Site personnel received a randomization notification indicating the unique subject identifier, the treatment assignment, and the date and time of randomization.

Each subject number was a unique identifier and once assigned was not reassigned.

### Key amendments made to the study protocol:

- Included details of sensitivity analyses to assess the impact of missing data for the noninferiority test.
- Introduced additional flexibility into glycemic eligibility criteria at Screening and to the process for transitioning subjects from their prior basal-bolus insulin therapy to insulin glargine and insulin lispro at the beginning of the Standardization Period, as well as providing additional flexibility to the investigator when adjusting insulin glargine and insulin lispro.
- Included information to further mitigate the potential risk of hypoglycaemia, as well as enhance subject education and training pertaining to hypoglycaemic events.

## Supplemental Data: Inclusion and Exclusion Criteria.

### ***Inclusion criteria***

1. Male or female, aged 18 to 75 years (inclusive at the time of Screening) with type 2 diabetes mellitus
2. HbA<sub>1c</sub>  $\geq 7.0\%$  and  $\leq 9.5\%$  ( $\geq 53$  and  $\leq 80$  mmol/mol) at Screening. If the first screening HbA<sub>1c</sub> does not meet the eligibility criterion, the HbA<sub>1c</sub> value may be checked up to two times during Screening, and if the average of these determinations meets the criterion, the patient may be eligible for further participation in the study
3. Currently treated with a basal-prandial insulin regimen (with or without metformin) for at least 3 months before Screening. The patient must be taking the following:
  - Basal insulin (one or two daily injections of neutral protamine Hagedorn insulin, insulin glargine, insulin detemir, or insulin degludec)AND
  - Prandial insulin (at least two injections of regular insulin, insulin glulisine, insulin aspart, or insulin lispro) with a total daily dose of prandial insulin  $\leq 70$  units
  - In addition, the total daily dose of insulin must be  $\leq 140$  units
  - If taking metformin, a stable dose for at least 8 weeks before Screening  
Note: Patient should not have received any other antihyperglycemic agent within 30 days before Screening (eg, GLP-1 receptor agonist, dipeptidyl peptidase-IV inhibitor, sulfonylurea, meglitinide, sodium-glucose transporter 2 inhibitor, or thiazolidinedione). Patients receiving commercially available premixed basal and prandial insulin are not eligible for this study
4. Fasting C-peptide  $\geq 0.8$  ng/mL ( $\geq 0.26$  nmol/L). If the fasting C-peptide is  $< 0.8$  ng/mL ( $< 0.26$  nmol/L) but stimulated C-peptide 90 minutes after a standardized mixed meal is  $\geq 1.5$  ng/mL ( $\geq 0.5$  nmol/L), the patient may be eligible for further participation in the study  
Note: Plasma glucose will also be measured 90 minutes after the standardized mixed meal; if the concurrent plasma glucose collected 90 minutes after the standardized mixed meal is not  $\geq 144.0$  mg/dL ( $\geq 8.0$  mmol/L), the stimulated C-peptide test may be repeated during an unscheduled visit.
5. Body mass index  $\leq 40.0$  kg/m<sup>2</sup>
6. Thyroid-stimulating hormone level is normal or clinically euthyroid as demonstrated by further thyroid tests (eg, free T4)
7. Female patients of childbearing potential (ie, not surgically sterile and/or not postmenopausal) must be practicing adequate contraception (as defined below) for the duration of participation in the study including the 4-week posttreatment Follow-up Period:
  - Abstinence from penile-vaginal intercourse, when this is the female's preferred and usual lifestyle
  - Oral contraceptive, either combined or progestogen alone. For patients participating at sites in Germany; progestogen-only pills are only

acceptable if they have a Pearl Index of less than 1.0 (eg, those containing 75 µg desogestrel

- Injectable progestogen
  - Implants of etonogestrel or levonorgestrel
  - Estrogenic vaginal ring
  - Percutaneous contraceptive patches
  - Intrauterine device or intrauterine system that has a failure rate of less than 1% per year when used consistently and correctly as stated in the product label
  - Male partner sterilization before the female patient's entry into the study, and this male is the sole partner for that patient. The information on the male sterility can come from the site personnel's review of the female patient's medical records, medical examination of the patient and/or semen analysis, or interview with the female patient on her male partner's medical history
  - Male condom combined with a female diaphragm, either with or without a vaginal spermicide (foam, gel, film, cream, or suppository)
8. Willing and able to comply with all study procedures including performance of frequent self-monitored blood glucose profiles and use of an e-diary according to the protocol
  9. Willing and able to provide written informed consent after a thorough explanation of the study by the investigator or designee, which will include the opportunity for the patients to ask questions
  10. Suitable for participation in a treat-to-target study, including intensified basal-prandial insulin therapy utilizing the prespecified glycemic targets defined in the protocol

### ***Exclusion criteria***

1. Type 1 diabetes mellitus
2. History of cancer that has not been in full remission for at least 3 years before Screening. (A history of squamous cell or basal cell carcinoma of the skin or treated cervical intra-epithelial neoplasia I or II is allowed)
3. Personal or family history of medullary thyroid carcinoma or multiple endocrine neoplasia type 2
4. Current symptomatic biliary disease or history of acute or chronic pancreatitis
5. Severe gastroparesis (ie, requiring regular therapy within 6 months before Screening)
6. History of significant gastrointestinal (GI) surgery that, in the opinion of the investigator, is likely to significantly affect upper GI or pancreatic function (eg, gastric bypass and banding, antrectomy, Roux-en-Y bypass, gastric vagotomy, small bowel resection, or surgeries thought to significantly affect upper GI function)
7. History of hypoglycemia unawareness (ie, the absence of autonomic warning symptoms before the development of neuroglycopenic symptoms such as blurred vision, difficulty speaking, feeling faint, difficulty thinking, and confusion)

8. Diabetic complications (eg, active proliferative retinopathy or severe diabetic neuropathy) or any other clinically significant abnormality (including a psychiatric disorder) that, in the opinion of the investigator, may pose additional risk in administering the investigational product
9. Clinically significant cardiovascular and/or cerebrovascular disease within 3 months before Screening including, but not limited to, the following:
  - Stroke or transient ischemic attack
  - Acute coronary syndrome (myocardial infarction or unstable angina not responsive to nitroglycerin)
  - Cardiac surgery or percutaneous coronary procedure
10. Any history of New York Heart Association class III or IV heart failure
11. Alanine aminotransferase (ALT)  $>2.5 \times$  upper limit of normal (ULN) or bilirubin  $>1.5 \times$  ULN (isolated bilirubin  $>1.5 \times$  ULN is acceptable if bilirubin is fractionated and direct bilirubin  $<35\%$ )
12. Unstable liver disease (as defined by the presence of ascites, encephalopathy, coagulopathy, hypoalbuminemia, esophageal or gastric varices, or persistent jaundice), cirrhosis, known biliary abnormalities (with the exception of Gilbert's syndrome or asymptomatic gallstones). (Chronic stable hepatitis B and C are acceptable if patient otherwise meets entry criteria and is not on active antiviral treatment [eg, presence of hepatitis B surface antigen or positive hepatitis C test result within 3 months of Screening])
13. Hemoglobin  $<11$  g/dL ( $<110$  g/L) for male patients and  $<10$  g/dL ( $<100$  g/L) for female patients at Screening
14. Estimated glomerular filtration rate  $\leq 30$  mL/min/1.73 m<sup>2</sup> (calculated using the Modification of Diet in Renal Disease formula) at Screening  
Note: As the use of metformin in patients with varying degrees of renal function may differ from country to country, use of metformin should be in accordance with the metformin product label within the participating country
15. Fasting triglyceride level  $>750$  mg/dL ( $>8.48$  mmol/L) at Screening
16. Hemoglobinopathy that may affect proper interpretation of HbA<sub>1c</sub>
17. Known allergy to albiglutide or any product components (including yeast and human albumin), any other GLP-1 analogue, insulin, or other study medication's excipients OR other contraindications (per the prescribing information) for the use of potential study medications (eg, insulin glargine, insulin lispro)
18. Use of oral or systemically injected glucocorticoids within the 3 months before randomization or high likelihood of a requirement for prolonged treatment ( $>1$  week) in the 6 months following randomization. However, short courses of oral steroids (single dose or multiple doses for up to 7 days) may be permitted provided these cases are discussed with the medical monitor. Inhaled, intra-articular, epidural, and topical corticosteroids are allowed
19. Female patient is pregnant (confirmed by laboratory testing) or lactating
20. Receipt of any investigational drug within the 30 days or five half-lives, whichever is longer, before Screening, a history of receipt of an investigational antihyperglycemic agent within the 3 months before randomization, or receipt of albiglutide in previous studies

## Supplementary Fig. 2. Reintroducing Insulin Lispro for Albiglutide-Treated Participants.

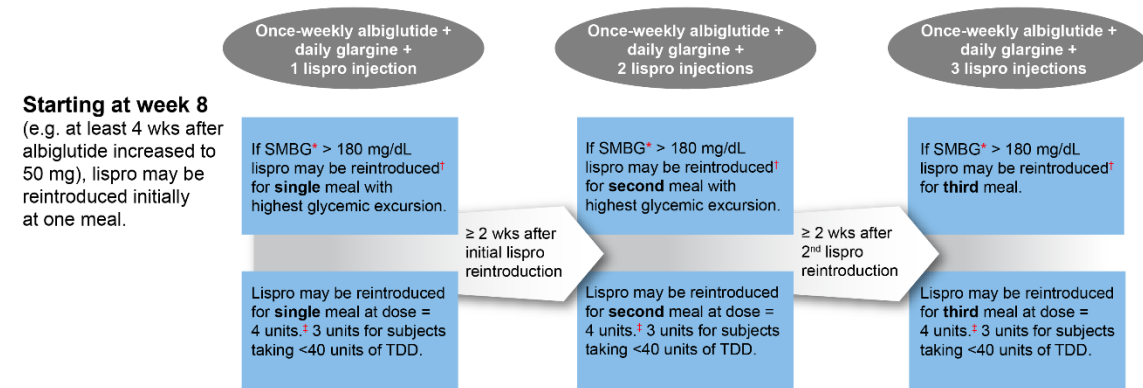

\* Mean of measurements (taken before lunch, dinner, or bedtime) from the last 3 available days (at least 2 of which are consecutive) in week before the next study visit/telephone contact. If measurements from 3 days (at least 2 of which are consecutive) are not available, the dose adjustment should be delayed until the next scheduled study visit/telephone contact; unless in the investigator's judgment, a dose adjustment is warranted. The subject should be retrained on the importance of SMBG measurements.

† According to investigator clinical judgment.

‡ Per investigator clinical judgment as appropriate for patient, lispro may be further titrated per titration algorithm.

SMBG denotes self-monitored blood glucose, TDD total daily dose of insulin.

SMBG >180 mg/dL is equal to >10.0 mmol/L.

**Note:** The algorithm for reintroduction of insulin lispro should apply in the majority of circumstances; however, as the intent of glycemia management is to individualize treatment goals to achieve a target HbA<sub>1c</sub> level as close to normal as possible without significant hypoglycemia or other adverse effects of treatment, the investigator was allowed to use his/her judgment in determining benefit/risk of further insulin dose adjustment and modification, accordingly. In the event an individual experienced significant evidence of hyperglycemia (eg, symptoms of polyuria and polydipsia and laboratory evidence of hyperglycemia) and the investigator determined that further dose adjustment with insulin was not in the best interest of the individual and that the individual required rescue with another antihyperglycemic medication, the individual was to be discontinued from the study and the appropriate rescue therapy initiated. Additionally, individuals not achieving a predefined threshold for glycemic control (confirmed FPG ≤270 mg/dL [15.0 mmol/L]) at any time within at least 8 weeks after randomization could be considered for study withdrawal based on the discretion of the investigator and the medical monitor.



## Supplementary Table 1. Titration Algorithm for Recommended Lispro Dose Adjustment.

| Plasma glucose before lunch and dinner, and before bedtime*                                                                                  |                                  | Adjustment of lispro (U) <sup>†</sup>                                                                       |
|----------------------------------------------------------------------------------------------------------------------------------------------|----------------------------------|-------------------------------------------------------------------------------------------------------------|
| mg/dL                                                                                                                                        | mmol/L                           |                                                                                                             |
| ≤99 without obvious explanation                                                                                                              | ≤5.5 without obvious explanation | -2 <sup>‡</sup><br>For a dose >50 U, consider a 5%–10% dose reduction at the discretion of the investigator |
| 100 – 119 = target                                                                                                                           | 5.6 – 6.6 = target               | No adjustment                                                                                               |
| 120 – 139                                                                                                                                    | 6.7 – 7.7                        | +2                                                                                                          |
| 140 – 179                                                                                                                                    | 7.8 – 9.9                        | +3                                                                                                          |
| ≥180                                                                                                                                         | ≥10.0                            | +4                                                                                                          |
| If severe hypoglycemia (requiring assistance) or any other clinically significant hypoglycemia was documented since the last dose adjustment |                                  | Decrease insulin dose at the investigator's discretion (ie, 10%–15%)                                        |

U denotes units.

\*Mean of measurements from the last 3 available days (at least two of which are consecutive) in the week before the next study visit/telephone contact. If measurements from the last 3 available days (at least two of which are consecutive) are not available, the dose adjustment should be delayed until the next scheduled study visit/telephone contact, unless in the investigator's judgment, a dose adjustment is warranted at that time.

<sup>†</sup>Modified based on the insulin titration algorithms in the BEGIN basal-prandial type 2 study<sup>1</sup> and other published treat-to-target studies.<sup>2-5</sup>

<sup>‡</sup>For patients with an SMPG value <70 mg/dL (<3.9 mmol/L) without obvious explanation, lispro may be stopped at the investigator's discretion.

**Supplementary Table 2. Titration Algorithm for Recommended Glargine Dose Adjustment.**

| Before breakfast plasma glucose*                                                                                                                                          |                        | Adjustment of glargine (U) <sup>†</sup>                         |
|---------------------------------------------------------------------------------------------------------------------------------------------------------------------------|------------------------|-----------------------------------------------------------------|
| mg/dL                                                                                                                                                                     | mmol/L                 |                                                                 |
| <56 <sup>‡</sup>                                                                                                                                                          | <3.1 <sup>‡</sup>      | -4<br>For a dose >50 U, consider 10% dose reduction             |
| 56 – 69 <sup>‡</sup>                                                                                                                                                      | 3.1 – 3.8 <sup>‡</sup> | -2<br>For a dose >50 U, consider 5% dose reduction              |
| 70 – 79                                                                                                                                                                   | 3.9 – 4.4              | -1                                                              |
| 80 – 109 = target                                                                                                                                                         | 4.5 – 6.0 = target     | No adjustment                                                   |
| 110 – 139                                                                                                                                                                 | 6.1 – 7.7              | +2                                                              |
| 140 – 179                                                                                                                                                                 | 7.8 – 9.9              | +4                                                              |
| ≥180                                                                                                                                                                      | ≥10.0                  | +6                                                              |
| If severe hypoglycemia (requiring assistance) or any other clinically significant hypoglycemia (eg, nocturnal hypoglycemia) was documented since the last dose adjustment |                        | Decrease insulin dose 10%–15%, at the investigator's discretion |

U denotes units.

\*Mean of measurements from the last 3 available days (at least two of which are consecutive) in the week before the next study visit/telephone contact. If measurements from the last 3 available days (at least two of which are consecutive) are not available, the dose adjustment should be delayed until the next scheduled study visit/telephone contact; unless in the investigator's judgment, a dose adjustment is warranted.

<sup>†</sup>Modified based on the insulin titration algorithms in the BEGIN basal-prandial type 2 study<sup>1</sup> and other published treat-to-target studies.<sup>2-5</sup>

<sup>‡</sup>Investigator may defer adjustment if there is an obvious reason for the low value, such as a missed meal.

## Supplemental Data: Prespecified Hierarchical Testing.

After demonstration of noninferiority, superiority of the albiglutide+glargine group against the lispro+glargine group was tested in a step-down sequential manner at a 2-sided significance level of 0.05 in the following order, as specified in the reporting and RAP:

1. Percentage of subjects with severe or documented symptomatic hypoglycemia through Week 26
2. Change from baseline in body weight at Week 26
3. Total daily insulin dose at Week 26
4. HbA<sub>1c</sub> change from baseline at Week 26

**Supplementary Table 3. Analysis Methods for Secondary End Points.**

| Secondary End Point                                                                                                                                    | Analysis Method                                                                                                                                               |
|--------------------------------------------------------------------------------------------------------------------------------------------------------|---------------------------------------------------------------------------------------------------------------------------------------------------------------|
| Proportion of participants treated with once-weekly albiglutide who were able to replace prandial insulin without the reintroduction of insulin lispro | Estimated using a 95% CI                                                                                                                                      |
| FPG and body weight                                                                                                                                    | Analyzed using a similar MMRM used for the primary end point, with the corresponding baseline value as a covariate                                            |
| Change over time in HbA <sub>1c</sub> and daily insulin use                                                                                            | Summarized descriptively                                                                                                                                      |
| Binary secondary end points (achieving HbA <sub>1c</sub> targets and occurrence of hypoglycemia)                                                       | Compared between groups using Cochran-Mantel-Haenszel test, adjusting for baseline HbA <sub>1c</sub> stratum, age group, current use of metformin, and region |

FPG denotes fasting plasma glucose, MMRM mixed-effects model with repeated measures.

## Supplementary Fig. 3. CONSORT Diagram.

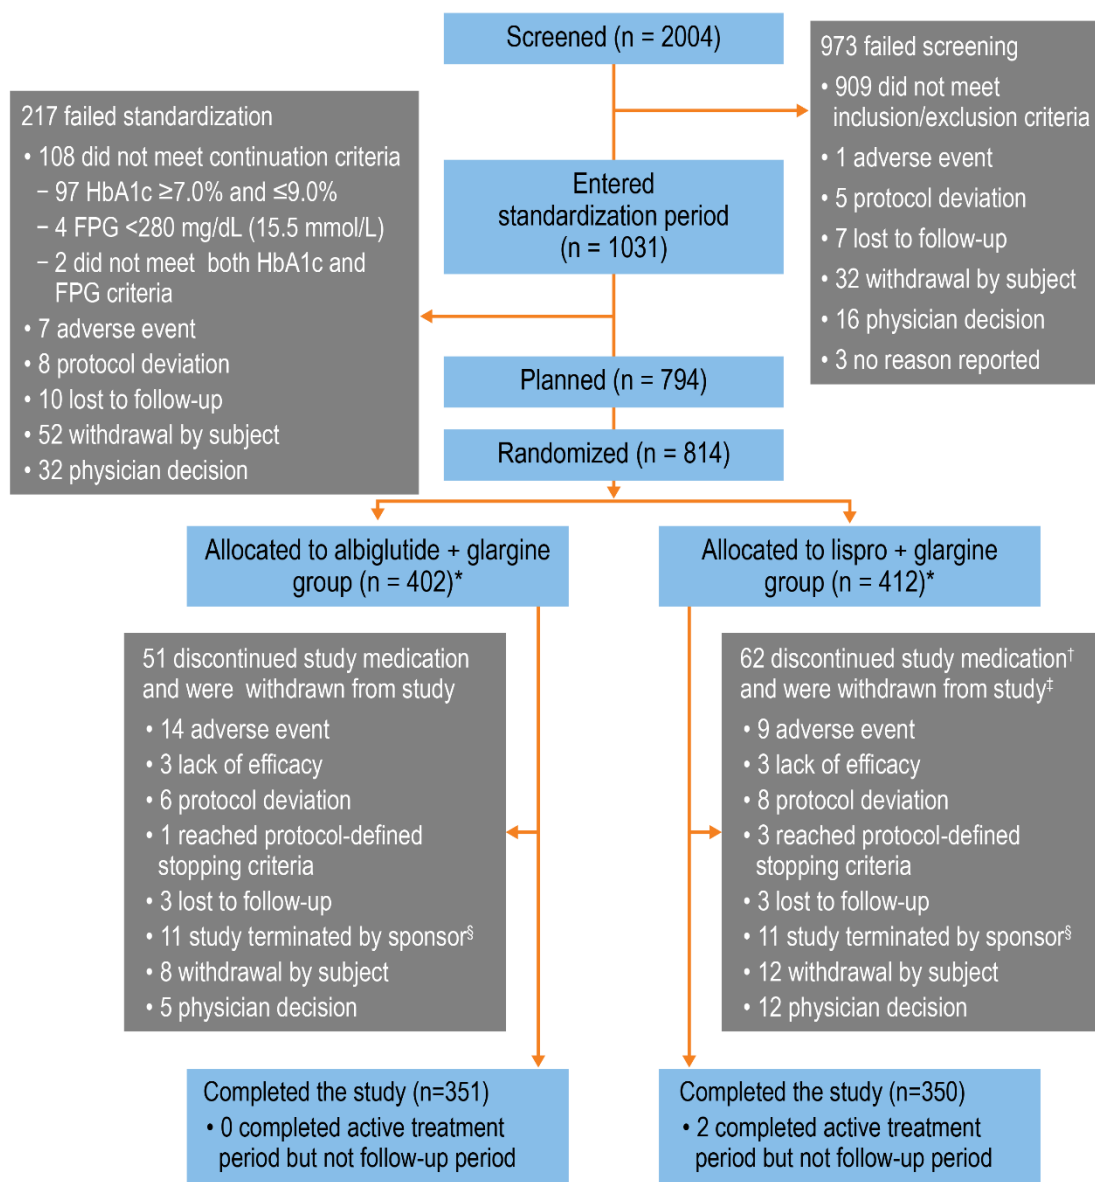

The first subject was initiated on 21-Nov-2014 and the last subject completed on 24-Jul-2017

\*One participant randomized to the albiglutide+glargine arm was mistakenly not dispensed albiglutide and was only dispensed lispro and glargine; the participant was analyzed for efficacy according to randomized treatment and for safety according to the actual treatment received. One participant randomized to the albiglutide+glargine arm was not treated with study drug and was excluded from the Safety population.

†Among 113 participants who discontinued study treatment, only one participant randomized to lispro+glargine continued in the study for the remaining scheduled visits and the follow-up visit instead of just the follow-up visit.

‡One participant randomized to lispro+glargine withdrew from the study after Week 16, but was mistakenly reported as "completed the study." This participant was from one site in Europe closed by study sponsor due to significant good clinical practice noncompliance.

§Participants withdrawn from the study with reason "Study terminated by sponsor" are participants from one site in Europe closed by study sponsor due to significant good clinical practice noncompliance. The study was not terminated.

**Supplementary Table 4. TRIM-Diabetes Questionnaire Individual Domain Scores\*.**

|                                           | Albiglutide + Glargine<br>(n=402)    | Lispro + Glargine<br>(n=412) |
|-------------------------------------------|--------------------------------------|------------------------------|
| Treatment burden domain score, mean±SD    |                                      |                              |
| Participants (n)                          | 347                                  | 350                          |
| Baseline                                  | 64.8±22.1                            | 67.1±20.4                    |
| Week 26                                   | 68.2±21.9                            | 67.5±21.5                    |
| Change from baseline                      | 3.5±20.7                             | 0.4±22.2                     |
| LS mean difference (95% CI)               | 1.66 (-1.12, 4.44); <i>P</i> = 0.241 |                              |
| Daily life domain score, mean±SD          |                                      |                              |
| Participants (n)                          | 345                                  | 347                          |
| Baseline                                  | 76.8±19.0                            | 75.8±20.2                    |
| Week 26                                   | 79.3±18.5                            | 76.9±18.6                    |
| Change from baseline                      | 2.6±19.6                             | 1.1±20.6                     |
| LS mean difference (95% CI)               | 2.16 (-0.29, 4.61); <i>P</i> = 0.083 |                              |
| Diabetes management domain score, mean±SD |                                      |                              |
| Participants (n)                          | 345                                  | 347                          |
| Baseline                                  | 61.9±21.5                            | 62.2±20.9                    |
| Week 26                                   | 68.2±20.7                            | 61.4±20.4                    |
| Change from baseline                      | 6.3±21.7                             | -0.73±20.9                   |
| LS mean difference (95% CI)               | 7.16 (4.49, 9.83); <i>P</i> <0.0001  |                              |
| Compliance domain score, mean±SD          |                                      |                              |
| Participants (n)                          | 345                                  | 347                          |
| Baseline                                  | 78.8±17.5                            | 79.2±17.1                    |
| Week 26                                   | 83.2±16.0                            | 78.8±17.7                    |

|                                                   |                                      |           |
|---------------------------------------------------|--------------------------------------|-----------|
| Change from baseline                              | 4.4±18.6                             | -0.4±16.8 |
| LS mean difference (95% CI)                       | 4.91 (2.72, 7.10); <i>P</i> <0.0001  |           |
| <b>Psychological health domain score, mean±SD</b> |                                      |           |
| Participants (n)                                  | 347                                  | 349       |
| Baseline                                          | 78.7±18.6                            | 81.3±16.5 |
| Week 26                                           | 83.5±16.0                            | 83.4±17.3 |
| Change from baseline                              | 4.9±16.1                             | 2.2±15.6  |
| LS mean difference (95% CI)                       | 1.49 (-0.54, 3.52); <i>P</i> = 0.150 |           |

\*TRIM-Diabetes total and domain scores range from 0 to 100 with higher scores indicative of better experienced health state (less negative impact).

## Supplementary Table 5. Overview of Adverse Events of Special Interest (Safety Population).

|                                      | Albiglutide + Glargine<br>(n=400) | Lispro + Glargine<br>(n=413) |
|--------------------------------------|-----------------------------------|------------------------------|
|                                      | n (%)                             | n (%)                        |
| Cardiovascular events                | 7 (1.8)                           | 9 (2.2)                      |
| Pancreatitis*                        | 1 (0.3)                           | 0                            |
| Thyroid adverse events               | 1 (0.3)                           | 0                            |
| Any gastrointestinal events          | 102 (25.5)                        | 53 (12.8)                    |
| Diarrhea                             | 31 (7.8)                          | 18 (4.4)                     |
| Nausea                               | 37 (9.3)                          | 7 (1.7)                      |
| Vomiting                             | 19 (4.8)                          | 4 (1.0)                      |
| Systemic allergic reactions – by CMQ | 27 (6.8)                          | 36 (8.7)                     |
| Injection-site reactions             | 8 (2.0)                           | 1 (0.2)                      |
| Malignant neoplasm – by CMQ          | 2 (0.5)                           | 2 (0.5)                      |
| Renal events                         | 1 (0.3)                           | 1 (0.2)                      |

For each level of summarization, a participant is counted once if the participant reported one or more events. Percentages are based on the number of participants in each treatment group.

CMQ, Customized MedDRA Query.

\*Confirmed acute pancreatitis by independent pancreatitis adjudication committee.

†“Thyroid AE” was a single report of goiter.

## References

1. Garber AJ, King AB, Del Prato S, et al. Insulin degludec, an ultra-longacting basal insulin, versus insulin glargine in basal-bolus treatment with mealtime insulin aspart in type 2 diabetes (BEGIN Basal-Bolus Type 2): a phase 3, randomised, open-label, treat-to-target non-inferiority trial. *Lancet* 2012;379:1498-507.
2. Rosenstock J, Ahmann AJ, Colon G, Scism-Bacon J, Jiang H, Martin S. Advancing insulin therapy in type 2 diabetes previously treated with glargine plus oral agents: prandial premixed (insulin lispro protamine suspension/lispro) versus basal/bolus (glargine/lispro) therapy. *Diabetes Care* 2008;31:20-5.
3. Abrahamson MJ, Peters A. Intensification of insulin therapy in patients with type 2 diabetes mellitus: an algorithm for basal-bolus therapy. *Ann Med* 2012;44:836-46.
4. Mathieu C, Rodbard HW, Cariou B, et al. A comparison of adding liraglutide versus a single daily dose of insulin aspart to insulin degludec in subjects with type 2 diabetes (BEGIN: VICTOZA ADD-ON). *Diabetes Obes Metab* 2014;16:636-44.
5. Riddle MC, Rosenstock J, Vlainic A, Gao L. Randomized, 1-year comparison of three ways to initiate and advance insulin for type 2 diabetes: twice-daily premixed insulin versus basal insulin with either basal-plus one prandial insulin or basal-bolus up to three prandial injections. *Diabetes Obes Metab* 2014;16:396-402.
